# Supplementary material for: Supercritical Phase Inversion to Produce Photocatalytic Active PVDF-coHFP_TiO2 Composites for the Degradation of Sudan Blue II Dye
Source: MDPI journal article supplement (doi:10.3390/ma15248894), 2022-12-13
Supplement: s1 [file s1]

Article

# Supercritical Phase Inversion to Produce Photocatalytic Active PVDF-coHFP\_TiO<sub>2</sub> Composites for the Degradation of Sudan Blue II Dye

Mariangela Guastaferro <sup>1</sup>, Lucia Baldino <sup>1,2,\*</sup>, Vincenzo Vaiano <sup>1,\*</sup>, Stefano Cardea <sup>1</sup> and Ernesto Reverchon <sup>1,2</sup>

<sup>1</sup> Department of Industrial Engineering, University of Salerno, Via Giovanni Paolo II, 132, Fisciano, 84084 Salerno, Italy

<sup>2</sup> C.U.G.R.I., InterUniversity Research Center for the Prediction and Prevention of Major Hazards, University of Salerno, Via Giovanni Paolo II, 132, Fisciano, 84084 Salerno, Italy

\* Correspondence: lbaldino@unisa.it (L.B.); vvaiano@unisa.it (V.V.)

## Supplementary Materials

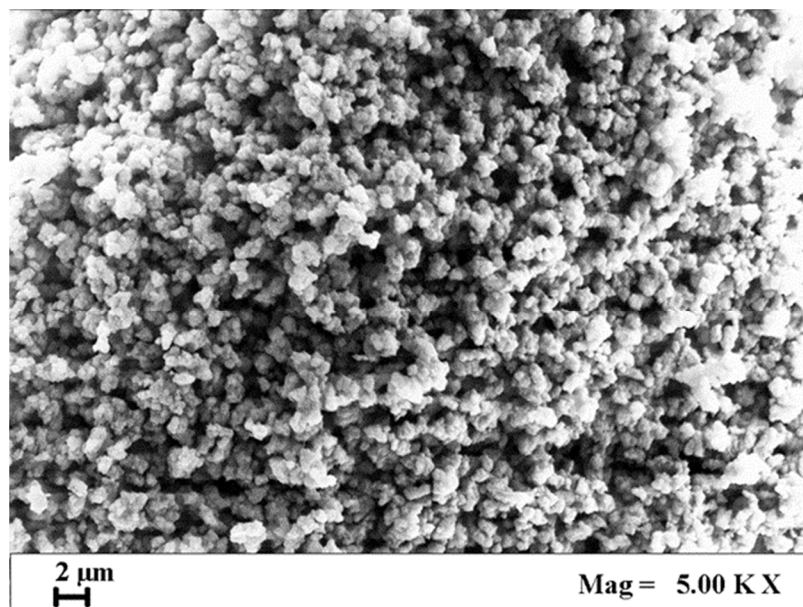

**Figure S1.** SEM image of commercial TiO<sub>2</sub> (P500).

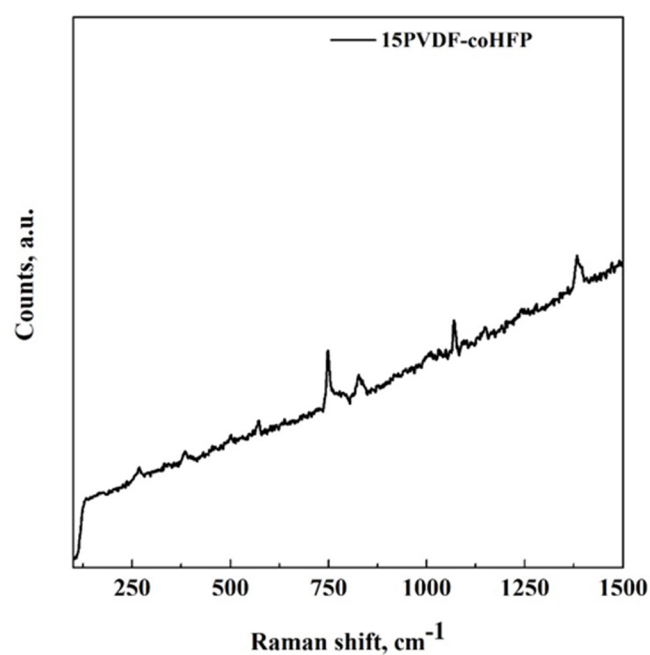

Figure S2. Raman spectrum of 15PVDF-coHFP.

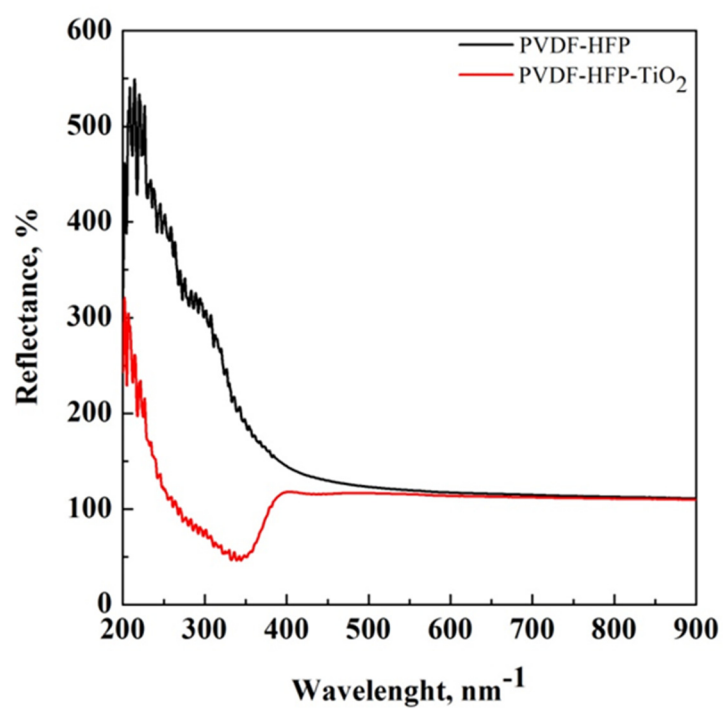

Figure S3. UV-vis DRS on PVDF-coHFP and PVDF-coHFP-TiO<sub>2</sub> membranes.
